# Supplementary material for: Spatial transcriptomics reveals distinct and conserved tumor core and edge architectures that predict survival and targeted therapy response
Source: PubMed Central journal article supplement (PMC10439131; doi:10.1038/s41467-023-40271-4), 2023-08-18
Supplement: 41467_2023_40271_MOESM3_ESM.pdf [file 41467_2023_40271_MOESM3_ESM.pdf]

## Description of Additional Supplementary Files

File Name: Supplementary Data 1

Description: Differentially expressed genes identified between all three nodal clusters of cancer cells. Genes were identified using a two-sided Wilcoxon rank sum test with a Bonferroni correction.

File Name: Supplementary Data 2

Description: Comprehensive hallmark pathway screening results for TC and LE spots. Table contains results from a two-sided multivariate distribution test, p-values are adjusted using a Bonferroni correction.

File Name: Supplementary Data 3

Description: Differentially expressed transcription factors between TC and LE spots. Table contains log<sub>2</sub>FC and adjusted p-value information for all differentially expressed genes as determined through a two-sided Wilcoxon rank sum test with a Bonferroni correction.

File Name: Supplementary Data 4

Description: DEGs factors between spatially deconvolved TC and LE cancer cells. Table contains log<sub>2</sub>FC and adjusted p-value information for all differentially expressed genes as determined through a two-sided Wilcoxon rank sum test with a Bonferroni correction.

File Name: Supplementary Data 5

Description: CellChat-predicted cell-cell signaling ligand receptor pairs and signaling strength (interaction probability). Table contains LE cancer cells, TC cancer cells, and LE ecm-myCAF cells as both sources and targets of signaling.

File Name: Supplementary Data 6

Description: Differentially spliced genes identified with scVelo are ordered based on fit likelihood. Genes differentially spliced based on LE, TC, and transitory spots are indicated.

File Name: Supplementary Data 7

Description: Trimmed AAC means for 70 drugs, drug mechanism of action, drug indication, upregulated and downregulated gene targets of drugs, and resultant dynamo in silico based perturbation vector field quantification.
